# Supplementary material for: Comprehensive profiling of the STE20 kinase family defines features essential for selective substrate targeting and signaling output
Source: PubMed Central journal article supplement (PMC6445471; doi:10.1371/journal.pbio.2006540), 2019-03-21
Supplement: pbio.2006540.s014.pdf [file pbio.2006540.s014.pdf]

**Table S1. List of primers used used in this study. OEPCR, overlap extension PCR.**

| Purpose                          | Template(s)      | Notes                              | Primer (5' to 3')                                            |
|----------------------------------|------------------|------------------------------------|--------------------------------------------------------------|
| Add attB site and Kozak sequence | PAK4             | Forward                            | GGGGACAAGTTTGTACAAAAAAGCAGGCTTCACCATGTTTGG<br>GAAGAGGAAGAAGC |
|                                  |                  | Reverse                            | GGGGACCACTTTGTACAAGAAAGCTG<br>GGTCTCTGGTGC GGTTCTGGCG        |
| Add attB site and Kozak sequence | TAOK2            | Forward                            | GGGGACAAGTTTGTACAAAAAAGCAGGCTTTAAGACCATG<br>CCAGCTGGGGGCCGG  |
|                                  |                  | Reverse                            | GGGGACCACTTTGTACAAGAAAGCTGGGTCTGCCTCTGGAA<br>CAGGATCTTCTTC   |
| Kinase dead mutation             | GCK              | D136N Forward                      | GGGAAGATCCACAGAAACATCAAGGGAGCCAAC                            |
|                                  |                  | D136N Reverse                      | GTTGGCTCCCTTGATGTTTCTGTGGATCTTCCC                            |
| Kinase dead mutation             | HGK              | D153N Forward                      | ATCATGTGATTCCACCGAATATCAAGGGCCAGAATG                         |
|                                  |                  | D153N Reverse                      | CATTCTGGCCCTTGATATTCCGGTGAATCACATGAT                         |
| Kinase dead mutation             | HPK1             | D137N Forward                      | CAGAAGAAGATACACAGGAACATCAAGGGAGCTAACATC                      |
|                                  |                  | D137N Reverse                      | GATGTTAGCTCCCTTGATGTTCTGTGTATCTTCTCTG                        |
| Kinase dead mutation             | KHS2             | D136N Forward                      | CACAGTAAAGGAAAAATGCACAGAAATATAAAGGGAGCTAAC<br>ATTCTATTAAC    |
|                                  |                  | D136N Reverse                      | GTTAATAGAATGTTAGCTCCCTTTATATTTCTGTGCATTTTTCT<br>TACTGTG      |
| Kinase dead mutation             | MINK             | D153N Forward                      | CAAGGTGATCCATCGAAACATCAAGGGGCAG                              |
|                                  |                  | D153N Reverse                      | CTGCCCTTGATGTTTCGATGGATCACCTTG                               |
| Kinase dead mutation             | mMST1            | D149N Forward                      | GAGAAAAATACACCGAAATATCAAGGCGGAAATATTTTGC                     |
|                                  |                  | D148N Reverse                      | GCAAAATATTTCCCGCCTTGATATTTCCGGTATTTTTCTC                     |
| Kinase dead mutation             | MST2             | D146N Forward                      | CACTTTATGAGAAAAATACACAGAAATATAAAGCTGGAAATA<br>TTCTCTC        |
|                                  |                  | D146N Reverse                      | GAGGAGAATATTTCCAGCTTTTATATTTCTGTGATTTTTCTCAT<br>AAAGTG       |
| Kinase dead mutation             | MST3             | D156N Forward                      | GGAGAAGAAAATCCACAGAAACATTAAGCGGCCAACG                        |
|                                  |                  | D156N Reverse                      | CGTTGGCCGCTTAATGTTTCTGTGGATTTTCTTCTCC                        |
| Kinase dead mutation             | TAOK2            | D151N Forward                      | CACAACATGATCCATAGGAATGTGAAGGCTGGAAACATC                      |
|                                  |                  | D151N Reverse                      | GATGTTCCAGCCTTCACATTCCTATGGATCATGTTGTG                       |
| Kinase dead mutation             | PAK4             | D440N Forward                      | GTCATCCACCGAACATCAAGAGCGAC                                   |
|                                  |                  | D440N Reverse                      | GTCGCTCTTGATGTTCCGGTGGATGAC                                  |
| PKC loop mutation                | PKC $\beta$      | D381A/D382A/D383A Forward          | GTTGTGATCCAAGCTGCTGCCGTGGAGTGCAC                             |
|                                  |                  | D381A/D382A/D383A Reverse          | GTGCACTCCACG GCAGCAGCTTGGATCACAAC                            |
| PAK KxxN mutation                | PAK4             | S443A/D444A Forward                | CATCCACCGGACATCAAGGCCGCTCGATCCTGCTGACCCAT<br>G               |
|                                  |                  | S443A/D444A Reverse                | CATGGGTGAGCAGGATCGAGGCGGCCTTGATGTCCCGTGG<br>TG               |
| PAK S445N activating mutation    | PAK4 S443A/D444A | S445N (on KxxN background) forward | CCGGGACATCAAGGCCCAACATCCTGCTGACCCATGATG                      |
|                                  |                  | S445N (on KxxN background) reverse | CATCATGGGTGAGCAGGATGTTGGCGGCCTTGATGTCCCGG                    |
|                                  | PAK4             | R359E/L362D Forward                | GACCTGCGCAAGCAGCAGGAGCGGAGGACCTTTCAACGAG<br>GTGGTAATC        |

|                                                                 |                                                    |                                          |                                                             |
|-----------------------------------------------------------------|----------------------------------------------------|------------------------------------------|-------------------------------------------------------------|
| PAK Loop step 1 mutation                                        |                                                    | R359E/L362D Reverse                      | GATTACCACCTCGTTGAAGAGGTCTCGCGCTCCTGCTGCTTGCGCAGGTC          |
| PAK Loop step 2 mutation                                        | PAK4 R359E/L362D                                   | R355E/K356E/Q357A/Q358ED/R360I Forward   | CGTCAAGAAGATGGACCTGGAGGAAGCAGAAGATGAGCGCGAGGACCTCTTC        |
|                                                                 |                                                    | R355E/K356E/Q357A/Q358ED/R360I Reverse   | GAAGAGGTCTCGCGCTCATCTTCTGCTTCCTCCAGGTCCATCTCTTGACG          |
| PAK DFG+1 mutation                                              | PAK4                                               | F461V Forward                            | TGTCAGACTTTGGGGTCTGCGCCAGGTG                                |
|                                                                 |                                                    | F461V Reverse                            | CACCTGGGCGCAGACCCCAAAGTCTGACA                               |
| MST4 KxxN mutation                                              | MST4                                               | A147S/A148D Forward                      | GAAAATTCACCGAGACATAAAATCTGACATGTCTTGCTCTCAG                 |
|                                                                 |                                                    | A147S/A148D Reverse                      | CTGAGAGCAAGACATTGTCAGATTTTATGTCTCGGTGAATTTTC                |
| MST4 Loop step 1 mutation                                       | MST4                                               | E63K/D66L Forward                        | CTTGAGGAAGCCGAAGATAAAATAGAACTCATTAGCAAGAAATAACT             |
|                                                                 |                                                    | E63K/D66L Reverse                        | CAGTATTTCTTGCTGAATGAGTTCTATTTTATCTTCGGCTTCTCAA              |
| MST4 Loop step 2 mutation                                       | MST4 E63K/D66L                                     | E58R/E59K/A60Q/E61Q/D62X/I64R Forward    | GCTATTAATAATCATAGACCTTCGCAAGCAGCAGAAAATAGAAC TCATTGACG      |
|                                                                 |                                                    | E58R/E59K/A60Q/E61Q/D62X/I64R Reverse    | GCTGAATGAGTTCTATTTTCTGCTGCTTGCGAAGGTCTATGATTTAATAGC         |
| MST4 DFG+1 mutation                                             | MST4                                               | V165F Forward                            | GCTGATTTTGGATTGCTGGTCAGCTG                                  |
|                                                                 |                                                    | V165F Reverse                            | AGCTGACCAGCAAATCCAAAATCAGC                                  |
| Create full length PAK4-M4 by OEPCR                             | PAK4 FL                                            | Forward of PAK4 FL (with attB and Kozak) | GGGGACAAGTTTGTACAAAAAAGCAGGCTTCACCATGTTTGGGAAGAGGAAGAAGCGGG |
|                                                                 |                                                    | Reverse overlap                          | GAGCGGGGCCAGGGGGCCAGG AACAGCAGGGGGCG                        |
|                                                                 | PAK4-cat                                           | Forward overlap                          | CGCCCTGCTGTTCTCGGGCCCTGGCCCCGCTC                            |
|                                                                 |                                                    | Reverse (with attB)                      | GGGGACCACTTTGTACAAGAAAGCTGGTCTCTGGTGCGGTTCTGG CGCATG        |
| PAK phosphomimetic mutation                                     | PAK4 and PAK4-M4                                   | S474E Forward                            | CCCCGAAGGAAGGAGCTGGTCGGCACGC                                |
|                                                                 |                                                    | S474E Reverse                            | GCGTGCCGACCAGCTCCTTCCTCGGGG                                 |
| PAK4 pcDNA-Flag subcloning                                      | PAK4 <sup>S474E</sup> and PAK4-M4 <sup>S474E</sup> | Forward                                  | ATGACGATAAAGCAAGGGATCCGTTTGGGAAGAGGAAGAAGC                  |
|                                                                 |                                                    | Reverse                                  | CGGCCGTTACTAGTGGATCCTCACTATCTGGTGCGGTTCTG                   |
| shRNA resistant PAK4                                            | PAK4                                               | Forward                                  | GCAGCAGAGGCGCGAGCTACTATTTAACGAGGTGGTAATCATGAG               |
|                                                                 |                                                    | Reverse                                  | CTCATGATTACCACCTCGTTAAATAGTAGCTCGCGCCTCTGCTGC               |
| YSK1 E293*                                                      | YSK1-cat                                           | Forward                                  | CGCTATAAGCGCTGGAAGTCATAGGGGCATGGC                           |
|                                                                 |                                                    | Reverse                                  | GCCATGCCCTATGACTTCCAGCGCTTATAGCG                            |
| Create PAK4-MST1 and PAK4 <sup>M4</sup> -MST1 chimeras by OEPCR | PAK4 cat or PAK4 <sup>M4</sup> cat                 | Forward of PAK4cat (with attB and Kozak) | GGGGACAAGTTTGTACAAAAAAGCAGGCTTCACCATGGCCCCGTCGCCAGGAAAATGG  |
|                                                                 |                                                    | Reverse overlap                          | CTTCTGGCGCTTCAGTTTACATCTCTGGTGCGGTTCTGGCCATG                |
|                                                                 | MST1                                               | Forward overlap                          | CATGCCAGAACCCGACCCAGAGATGTGAACTGAAGCGCCAGGAAG               |
|                                                                 |                                                    | Reverse (with attB)                      | GGGGACCACTTTGTACAAGAAAGCTGGTCAAGTTCTGTTGCCTCTTCTTG          |
| Create $\beta$ -catenin minor PAK4                              | $\beta$ -catenin                                   | S552A Forward                            | GTTCCACCCATGGCGGTGCGCCGTTGG                                 |

|                                                |                                                      |                                 |                                            |
|------------------------------------------------|------------------------------------------------------|---------------------------------|--------------------------------------------|
| sites mutant                                   |                                                      | S552A Reverse                   | CCAACGGCGCACCCGCATGGGTGGAAC                |
|                                                |                                                      | T556A Forward                   | CCTCCATGGGTGGAGCGCAGCAGCAG                 |
|                                                |                                                      | T556A Reverse                   | CTGCTGCTGCGCTCCACCCATGGAGG                 |
| Create +1W $\beta$ -catenin                    | $\beta$ -catenin S552A/T556A                         | V676W Forward                   | CAAGAAGCGGCTTTCATGGGAGCTGACCAGTTC          |
|                                                |                                                      | V676W Reverse                   | GAACTGGTCAGCTCCCATGAAAGCCGCTTCTTG          |
| Create phospho-resistant $\beta$ -catenin      | $\beta$ -catenin S552A/T556A                         | S675A Forward                   | GATTACAAGAAGCGGCTTGCAGTCGAGCTGACCAGTTC     |
|                                                |                                                      | S675A Reverse                   | GAACTGGTCAGCTCGACTGCAAGCCGCTTCTTGTAATC     |
| $\beta$ -catenin MST motif mutation step 1     | $\beta$ -catenin S552A/T556A                         | K672G/R673Y/L674N/S675T Forward | GCCACAGGATTACAAGGGATATAATACAGTCGAGCTGACCAG |
|                                                |                                                      | K672G/R673Y/L674N/S675T Reverse | CTGGTCAGCTCGACTGTATTATATCCCTTGAATCCTGTGGC  |
| $\beta$ -catenin MST motif mutation step 2     | $\beta$ -catenin S552A/T556A/K672G/R673Y/L674N/S675T | E677R/L678R/T679K/S680K Forward | GGATATAATACAGTCCGGCGGAAAAATCCCTCTCAGGACAG  |
|                                                |                                                      | E677R/L678R/T679K/S680K Reverse | CTGTCTGAAGAGGGATTTTTCCGCCGGACTGTATTATATCC  |
| $\beta$ -catenin MST phospho-resistant control | $\beta$ -catenin MST                                 | T675A Forward                   | CAAGGGATATAATGCAGTCCGGCGGAAAAATC           |
|                                                |                                                      | T675A Reverse                   | GATTTTTCCGCCGGACTGCATTATATCCCTTG           |
